# Supplementary material for: Comparative Transcriptome Profiling Reveals Key MicroRNAs and Regulatory Mechanisms for Aluminum Tolerance in Olive
Source: MDPI journal article supplement (doi:10.3390/plants12050978), 2023-02-21
Supplement: s1 [file s1]

**Table S1.** Summary of high-throughput sequencing of small RNAs from olive roots.

| Library Type                 | ZL         |            | FS         |            |
|------------------------------|------------|------------|------------|------------|
|                              | Control    | Al         | Control    | Al         |
| Total raw reads              | 29,566,134 | 29,626,516 | 29,635,826 | 29,637,498 |
| Total clean reads            | 27,011,675 | 27,136,823 | 26,674,901 | 26,916,653 |
| Total clean reads ratio (%)  | 91.36%     | 91.60%     | 90.01%     | 90.82%     |
| Mapped to Genome             | 18,815,636 | 17,398,002 | 21,131,762 | 20,574,969 |
| Total mapped reads ratio (%) | 69.66%     | 64.11%     | 79.22%     | 76.44%     |
| Conserved miRNAs             | 175        | 169        | 172        | 170        |
| Novel miRNAs                 | 142        | 144        | 143        | 145        |

Total clean reads ratio (%) = Total clean reads / Total raw reads. Total mapped reads ratio (%) = Mapped to Genome / Total clean reads. ZL-Control and FS-Control correspond to ZL and FS grown in BNS; ZL-Al and FS-Al correspond to ZL and FS grown in BNS with 50  $\mu$ M AlCl<sub>3</sub>.

**Table S2.** Summary of differentially expressed miRNA from olive roots in ZL and FS.

| Group | Al <i>vs</i> control |      | Known | Novel | Total |
|-------|----------------------|------|-------|-------|-------|
|       | ZL                   | FS   |       |       |       |
| I     | Up                   | Up   | 4     | 5     | 9     |
| II    | Up                   | Non  | 1     | 1     | 2     |
| III   | Up                   | Down | 8     | 1     | 9     |
| IV    | Down                 | Up   | 8     | 0     | 8     |
| V     | Down                 | Non  | 2     | 0     | 2     |
| VI    | Down                 | Down | 2     | 0     | 2     |
| VII   | Non                  | Up   | 6     | 0     | 6     |
| VIII  | Non                  | Down | 8     | 3     | 11    |

**Table S3.** Identification of Al stress responsive miRNAs in ZL.

| miRNA ID                         | log <sub>2</sub> (Al <i>vs</i> Control) | P-value |
|----------------------------------|-----------------------------------------|---------|
| <b>miRNAs up-regulated in ZL</b> |                                         |         |
| miR167d                          | 1.9662                                  | 0.0000  |
| novel_mir32                      | 9.9818                                  | 0.0000  |
| novel_mir9                       | 5.0266                                  | 0.0000  |
| miR156a-5p                       | 1.3781                                  | 0.0000  |
| novel_mir39                      | 2.9304                                  | 0.0000  |
| miR166e                          | 1.3365                                  | 0.0000  |
| miR319f_1                        | 1.2876                                  | 0.0054  |
| novel_mir125                     | 4.8305                                  | 0.0002  |
| miR396g-5p_1                     | 2.1831                                  | 0.0000  |
| novel_mir137                     | 3.3577                                  | 0.0000  |
| miR169v_1                        | 1.3580                                  | 0.0000  |
| novel_mir154                     | 2.6794                                  | 0.0000  |
| miR160a-3p_1                     | 2.6964                                  | 0.0000  |
| miR169e_3                        | 2.8271                                  | 0.0000  |
| miR156e_1                        | 1.4259                                  | 0.0000  |
| miR395a_5                        | 1.7094                                  | 0.0000  |
| novel_mir78                      | 3.6095                                  | 0.0000  |
| miR319c_1                        | 3.4903                                  | 0.0000  |
| miR3627a_2                       | 1.0164                                  | 0.0008  |
| miR156f-3p_1                     | 2.3000                                  | 0.0010  |
| miR390                           | 2.0506                                  | 0.0000  |
| novel_mir90                      | 1.6635                                  | 0.0000  |
| novel_mir40                      | 4.8305                                  | 0.0002  |
| novel_mir31                      | 1.7651                                  | 0.0000  |
| miR319b-5p_2                     | 1.6606                                  | 0.0014  |
| miR172c_2                        | 3.1300                                  | 0.0098  |
| miR393h                          | 1.4255                                  | 0.0000  |
| miR396g-5p                       | 1.0462                                  | 0.0000  |
| miR399e_5                        | 1.9076                                  | 0.0008  |
| miR399j_1                        | 2.1942                                  | 0.0000  |

| miRNA ID                           | log <sub>2</sub> (AI <i>vs</i> Control) | P-value |
|------------------------------------|-----------------------------------------|---------|
| <b>miRNAs down-regulated in ZL</b> |                                         |         |
| miR160                             | -4.5951                                 | 0.0000  |
| miR156                             | -4.2532                                 | 0.0000  |
| miR396a-3p_4                       | -5.3488                                 | 0.0000  |
| miR3711                            | -2.0736                                 | 0.0000  |
| miR166h-3p                         | -1.4758                                 | 0.0000  |
| novel_mir141                       | -1.0732                                 | 0.0000  |
| miR166m_2                          | -2.5264                                 | 0.0000  |
| miR167d-5p                         | -1.2490                                 | 0.0000  |
| miR166                             | -1.3953                                 | 0.0000  |
| miR397-5p_1                        | -2.4566                                 | 0.0000  |
| miR160a-5p                         | -3.7383                                 | 0.0000  |
| miR394a_1                          | -2.4549                                 | 0.0000  |
| miR160g_1                          | -2.3729                                 | 0.0000  |
| novel_mir104                       | -1.0725                                 | 0.0000  |
| miR169b-5p                         | -2.7710                                 | 0.0000  |
| miR319a-3p                         | -2.6975                                 | 0.0000  |
| novel_mir94                        | -1.2838                                 | 0.0000  |
| miR2111-5p                         | -2.4060                                 | 0.0000  |
| novel_mir96                        | -4.3294                                 | 0.0011  |
| miR167c-3p_3                       | -2.3935                                 | 0.0003  |
| novel_mir45                        | -5.3294                                 | 0.0000  |
| miR164a_2                          | -3.3294                                 | 0.0029  |
| miR169h_2                          | -1.3294                                 | 0.0002  |
| miR168-3p                          | -1.3725                                 | 0.0000  |

**Table S4.** Identification of Al stress responsive miRNAs in FS.

| miRNA ID                         | log <sub>2</sub> (Al <i>vs</i> Control) | P-value |
|----------------------------------|-----------------------------------------|---------|
| <b>miRNAs up-regulated in FS</b> |                                         |         |
| novel_mir32                      | 3.1389                                  | 0.0000  |
| miR160                           | 2.7124                                  | 0.0000  |
| novel_mir9                       | 5.6711                                  | 0.0000  |
| miR156a-5p                       | 5.4876                                  | 0.0000  |
| miR171b-3p                       | 6.2526                                  | 0.0000  |
| miR396a-3p_4                     | 1.0412                                  | 0.0000  |
| miR3711                          | 1.2709                                  | 0.0000  |
| miR166e-3p                       | 1.3706                                  | 0.0000  |
| novel_mir39                      | 1.6867                                  | 0.0000  |
| miR166m_2                        | 1.4445                                  | 0.0000  |
| miR166                           | 1.4197                                  | 0.0000  |
| miR399j_2                        | 1.2360                                  | 0.0000  |
| novel_mir125                     | 10.4948                                 | 0.0000  |
| novel_mir137                     | 10.2609                                 | 0.0000  |
| miR397-5p_1                      | 3.3704                                  | 0.0000  |
| miR399a_6                        | 3.0485                                  | 0.0000  |
| miR169k                          | 1.4217                                  | 0.0000  |
| novel_mir67                      | 3.1189                                  | 0.0000  |
| miR319_1                         | 1.1019                                  | 0.0000  |
| miR394a_1                        | 1.4155                                  | 0.0000  |
| miR169e_3                        | 1.2374                                  | 0.0000  |
| miR395a_5                        | 1.6700                                  | 0.0000  |
| miR169d-5p_1                     | 1.7273                                  | 0.0000  |
| miR169b-5p                       | 1.3008                                  | 0.0000  |
| miR160a-5p_1                     | 4.6643                                  | 0.0000  |
| miR156h                          | 4.8801                                  | 0.0000  |
| miR156a                          | 1.1359                                  | 0.0000  |
| miR169f.1                        | 1.9081                                  | 0.0000  |
| miR3627a_2                       | 2.5430                                  | 0.0002  |
| novel_mir46                      | 1.1920                                  | 0.0002  |
| miR160h_1                        | 4.1025                                  | 0.0058  |
| novel_mir80                      | 1.4326                                  | 0.0067  |
| miR398a-3p_1                     | 1.1145                                  | 0.0092  |

| miRNA ID                           | log <sub>2</sub> (AI <i>vs</i> Control) | P-value |
|------------------------------------|-----------------------------------------|---------|
| <b>miRNAs down-regulated in FS</b> |                                         |         |
| novel_mir13                        | -1.1923                                 | 0.0000  |
| miR396a-3p_1                       | -2.1524                                 | 0.0000  |
| miR167d                            | -4.8003                                 | 0.0000  |
| miR396a-5p                         | -3.1857                                 | 0.0000  |
| miR156                             | -6.1833                                 | 0.0000  |
| miR166h-3p                         | -1.7060                                 | 0.0000  |
| miR171b-3p_3                       | -2.5574                                 | 0.0000  |
| miR168b_1                          | -1.2585                                 | 0.0000  |
| miR166e                            | -1.5501                                 | 0.0000  |
| miR159a-5p_5                       | -1.3721                                 | 0.0000  |
| miR408-3p_2                        | -1.4027                                 | 0.0000  |
| miR319f_1                          | -4.5454                                 | 0.0000  |
| miR396g-5p_1                       | -4.5535                                 | 0.0000  |
| miR169v_1                          | -2.7019                                 | 0.0000  |
| miR319a                            | -2.9046                                 | 0.0000  |
| novel_mir98                        | -1.0959                                 | 0.0000  |
| miR172b-5p_3                       | -1.2555                                 | 0.0000  |
| miR395b_3                          | -1.5055                                 | 0.0000  |
| miR160a-3p_1                       | -2.4274                                 | 0.0000  |
| miR156e_1                          | -4.0972                                 | 0.0000  |
| miR393b-5p                         | -1.1683                                 | 0.0000  |
| miR156_2                           | -1.2354                                 | 0.0000  |
| novel_mir78                        | -6.5378                                 | 0.0000  |
| novel_mir72                        | -1.4639                                 | 0.0000  |
| novel_mir83                        | -1.2899                                 | 0.0000  |
| novel_mir151                       | -1.1346                                 | 0.0000  |
| miR164e-5p                         | -1.6835                                 | 0.0000  |
| novel_mir59                        | -5.2285                                 | 0.0000  |
| miR172d-5p_4                       | -1.3163                                 | 0.0003  |
| miR156f-3p_1                       | -2.5794                                 | 0.0003  |
| miR167a                            | -1.8424                                 | 0.0034  |

**Table S5.** Comparison of Al stress responsive miRNAs in two olive genotypes.

| miRNA ID                                                  | ZL   | FS   | Putative target | Annotation                                                                            |
|-----------------------------------------------------------|------|------|-----------------|---------------------------------------------------------------------------------------|
| <b>miRNAs down-regulated in ZL and up-regulated in FS</b> |      |      |                 |                                                                                       |
| miR160                                                    | -4.6 | 2.7  | XM_022996383.1  | probable methyltransferase PMT5 isoform X3 [ <i>Sesamum indicum</i> ]                 |
| miR166                                                    | -2.5 | 1.4  | XM_023033880.1  | homeobox-leucine zipper protein ATHB-15 [ <i>Sesamum indicum</i> ]                    |
| miR3711                                                   | -2.1 | 1.3  | XM_023029508.1  | zinc finger protein BRUTUS-like At1g18910 isoform X1 [ <i>Sesamum indicum</i> ]       |
| miR166m_2                                                 | -2.5 | 1.4  | XM_022988900.1  | homeobox-leucine zipper protein ATHB-15 [ <i>Sesamum indicum</i> ]                    |
| miR397-5p_1                                               | -2.5 | 3.4  | XM_023032806.1  | laccase-7-like [ <i>Nicotiana tomentosiformis</i> ]                                   |
| miR394a_1                                                 | -2.5 | 1.4  | XM_023028746.1  | ABC transporter D family member 1 [ <i>Sesamum indicum</i> ]                          |
| miR169b-5p                                                | -2.8 | 1.3  | XM_023034476.1  | nuclear transcription factor Y subunit A-1-like [ <i>Sesamum indicum</i> ]            |
|                                                           |      |      | XM_023040847.1  | nuclear transcription factor Y subunit A-1-like [ <i>Sesamum indicum</i> ]            |
|                                                           |      |      | XM_023040848.1  | nuclear transcription factor Y subunit A-1-like [ <i>Sesamum indicum</i> ]            |
|                                                           |      |      | XM_023042536.1  | nuclear transcription factor Y subunit A-1 isoform X1                                 |
| miR396a-3p_4                                              | -5.3 | 1    | XM_023010161.1  | rho GTPase-activating protein 3 [ <i>Sesamum indicum</i> ]                            |
| <b>miRNAs down-regulated in ZL and non-changed in FS</b>  |      |      |                 |                                                                                       |
| miR167d-5p                                                | -1.2 | 0.8  | XM_023009656.1  | K <sup>+</sup> efflux antiporter 6 isoform X1 [ <i>Sesamum indicum</i> ]              |
| miR160a-5p                                                | -3.7 | 0.4  | XM_022996649.1  | auxin response factor 18 [ <i>Sesamum indicum</i> ]                                   |
| miR160g_1                                                 | -2.4 | 0.7  | XM_022996649.1  | auxin response factor 18-like [ <i>Solanum pennellii</i> ]                            |
| miR319a-3p                                                | -2.7 | 0.2  | XM_023020858.1  | transcription factor MYB33-like [ <i>Prunus avium</i> ]                               |
|                                                           |      |      | XM_023031930.1  | transcription factor GAMYB-like [ <i>Sesamum indicum</i> ]                            |
|                                                           |      |      | XM_023016833.1  | TCP transcription factor CIN2A [ <i>Petrocosmea sinensis</i> ]                        |
|                                                           |      |      | XM_023030926.1  | transcription factor TCP4-like [ <i>Sesamum indicum</i> ]                             |
| miR2111-5p                                                | -2.4 | -0.7 | XM_022985946.1  | unnamed protein product [ <i>Coffea canephora</i> ]                                   |
| novel_mir141                                              | -1.1 | 0.9  | XM_023012233.1  | uncharacterized protein LOC105165878 [ <i>Sesamum indicum</i> ]                       |
| novel_mir104                                              | -1.1 | 0.5  | NA              | NA                                                                                    |
| novel_mir94                                               | -1.3 | 0.6  | NA              | NA                                                                                    |
| novel_mir96                                               | -4.3 | -0.2 | NA              | NA                                                                                    |
| <b>miRNAs non-changed in ZL and up-regulated in FS</b>    |      |      |                 |                                                                                       |
| miR156a                                                   | 0.5  | 1.1  | XM_022986496.1  | squamosa promoter-binding-like protein 9 [ <i>Sesamum indicum</i> ]                   |
|                                                           |      |      | XM_023020858.1  | transcription factor MYB33-like [ <i>Prunus avium</i> ]                               |
| miR319_1                                                  | -0.8 | 1.1  | XM_023031930.1  | transcription factor GAMYB-like [ <i>Sesamum indicum</i> ]                            |
|                                                           |      |      | XM_023016833.1  | TCP transcription factor CIN2A [ <i>Petrocosmea sinensis</i> ]                        |
|                                                           |      |      | XM_023030926.1  | transcription factor TCP4-like [ <i>Sesamum indicum</i> ]                             |
| miR171b-3p                                                | -0.3 | 6.3  | XM_022990202.1  | scarecrow-like protein 22 isoform X1 [ <i>Sesamum indicum</i> ]                       |
|                                                           |      |      | XM_023012724.1  | probable E3 ubiquitin ligase SUD1 [ <i>Sesamum indicum</i> ]                          |
| miR166e-3p                                                | 0.8  | 1.4  | XM_023033880.1  | homeobox-leucine zipper protein ATHB-15 [ <i>Sesamum indicum</i> ]                    |
| miR399j_2                                                 | 0.6  | 1.2  | XM_022991328.1  | mitochondrial-processing peptidase subunit alpha-like [ <i>Sesamum indicum</i> ]      |
| miR399a_6                                                 | 1    | 3    | XM_023034395.1  | dehydration-responsive element-binding protein 2A-like [ <i>Nicotiana attenuata</i> ] |

| miRNA ID                                                  | ZL   | FS   | Putative target | Annotation                                                                                   |
|-----------------------------------------------------------|------|------|-----------------|----------------------------------------------------------------------------------------------|
| <b>miRNAs non-changed in ZL and down-regulated in FS</b>  |      |      |                 |                                                                                              |
| miR319a                                                   | -0.8 | -2.9 | XM_023002756.1  | transcription factor GAMYB-like isoform X1 [ <i>Sesamum indicum</i> ]                        |
| miR395b_3                                                 | 0.5  | -1.5 | XM_022989273.1  | paired amphipathic helix protein Sin3-like 2 isoform X1 [ <i>Sesamum indicum</i> ]           |
| miR396a-5p                                                | 0.8  | -3.2 | XM_022998171.1  | PREDICTED: factor of DNA methylation 1-like [ <i>Erythranthe guttata</i> ]                   |
| miR393b-5p                                                | 0.6  | -1.2 | XM_023013314.1  | protein TRANSPORT INHIBITOR RESPONSE 1-like [ <i>Sesamum indicum</i> ]                       |
| miR396a-3p_1                                              | -0.3 | -2.2 | XM_023010161.1  | rho GTPase-activating protein 3 [ <i>Sesamum indicum</i> ]                                   |
| miR171b-3p_3                                              | 0.8  | -2.6 | XM_022990202.1  | scarecrow-like protein 22 isoform X1 [ <i>Sesamum indicum</i> ]                              |
| miR159a-5p_5                                              | 0.3  | -1.4 | XM_022994469.1  | protein GIGANTEA-like [ <i>Sesamum indicum</i> ]                                             |
| miR408-3p_2                                               | 0.9  | -1.4 | XM_023037301.1  | LRR receptor kinase BAK1 [ <i>Sesamum indicum</i> ]                                          |
| novel_mir13                                               | 0.5  | -1.2 | XM_022998275.1  | homeobox-leucine zipper protein ATHB-20-like [ <i>Sesamum indicum</i> ]                      |
| novel_mir151                                              | 0.7  | -1.1 | XM_023016268.1  | pectin acetyltransferase 8 isoform X1 [ <i>Sesamum indicum</i> ]                             |
| novel_mir59                                               | -0.4 | -5.2 | NA              | NA                                                                                           |
| <b>miRNAs up-regulated in ZL and down-regulated in FS</b> |      |      |                 |                                                                                              |
| miR167d                                                   | 2    | -4.8 | XM_023003370.1  | mediator of RNA polymerase II transcription subunit 12 isoform X1 [ <i>Sesamum indicum</i> ] |
| miR166e                                                   | 1.3  | -1.6 | XM_023011037.1  | homeobox-leucine zipper protein ATHB-14 isoform X2 [ <i>Sesamum indicum</i> ]                |
|                                                           |      |      | XM_022986682.1  | nuclear transcription factor Y subunit A-10 [ <i>Sesamum indicum</i> ]                       |
|                                                           |      |      | XM_023034476.1  | nuclear transcription factor Y subunit A-1-like [ <i>Sesamum indicum</i> ]                   |
|                                                           |      |      | XM_023040847.1  | nuclear transcription factor Y subunit A-1-like [ <i>Sesamum indicum</i> ]                   |
|                                                           |      |      | XM_023040848.1  | nuclear transcription factor Y subunit A-1-like [ <i>Sesamum indicum</i> ]                   |
| miR169v_1                                                 | 1.3  | -4.5 | XM_023042536.1  | nuclear transcription factor Y subunit A-1 isoform X1 [ <i>Sesamum indicum</i> ]             |
|                                                           |      |      | XM_022986496.1  | squamosa promoter-binding-like protein 9 [ <i>Sesamum indicum</i> ]                          |
|                                                           |      |      | XM_023012846.1  | phosphatidylinositol/phosphatidylcholine transfer protein SFH8 [ <i>Sesamum indicum</i> ]    |
| miR319f_1                                                 | 2.7  | -2.4 | XM_023030926.1  | transcription factor TCP4-like [ <i>Sesamum indicum</i> ]                                    |
|                                                           |      |      | XM_022992333.1  | katanin p80 WD40 repeat-containing subunit B1 homolog [ <i>Sesamum indicum</i> ]             |
| miR396g-5p_1                                              | 1.4  | -4.1 | XM_022992333.1  | histone-lysine N-methyltransferase ATXR3-like isoform X1 [ <i>Sesamum indicum</i> ]          |
| miR160a-3p_1                                              | 3.6  | -6.5 | XM_022989759.1  | unnamed protein product [ <i>Coffea canephora</i> ]                                          |
| miR156f-3p_1                                              | 2.3  | -2.6 | XM_022993063.1  | telomere repeat-binding factor 1 isoform X3 [ <i>Sesamum indicum</i> ]                       |
| novel_mir78                                               | 2.5  | -1.3 | XM_023030235.1  | telomere repeat-binding factor 1 isoform X3 [ <i>Sesamum indicum</i> ]                       |
| <b>miRNAs up-regulated in ZL and non-changed in FS</b>    |      |      |                 |                                                                                              |
| miR319c_1                                                 | 3.5  | -0.4 | XM_023016833.1  | TCP transcription factor CIN2A [ <i>Petrocosmea sinensis</i> ]                               |
|                                                           |      |      | XM_023030926.1  | transcription factor TCP4-like [ <i>Sesamum indicum</i> ]                                    |
| novel_mir154                                              | 2.7  | 0.3  | NA              | NA                                                                                           |
